# Supplementary material for: Tris(imidazolyl) dicopper(i) complex and its reactivity to exert the catalytic oxidation of sterically hindered phenol substratesviaa [Cu2O]2+core
Source: Royal Society of Chemistry journal article supplement (doi:10.1039/d1dt04084g), 2022-01-01
Supplement: d1dt04084g1.pdf [file d1dt04084g1.pdf]

## Supplementary Information

### Tris(Imidazolyl) Dicopper(I) Complex and its Reactivity to Exert Catalytic Oxidation of Sterically Hindered Phenol Substrates via a $[\text{Cu}_2\text{O}]^{2+}$ Core

By

*Chih-Yu Chen and Ming-Li Tsai\**

Department of Chemistry, National Sun Yat-sen University, Kaohsiung 80424, Taiwan

\*Corresponding author. E-mail: [mltsai@mail.nsysu.edu.tw](mailto:mltsai@mail.nsysu.edu.tw)

## Contents

**Fig. S1** The (a)  $^1\text{H}$  NMR and (b)  $^{13}\text{C}$  NMR spectra (c) IR (d) high-resolution FT-Mass of bimeta ligand and the assignments of the corresponding peaks/signals.

**Fig. S2** The (a)  $^1\text{H}$  NMR and (b)  $^{13}\text{C}$  NMR spectra of complex **1** and the assignments of the corresponding peaks/signals.

**Fig. S3** (a) The cyclic voltammograms of complex **1** measured in  $\text{CH}_3\text{CN}$  with 0.1 M  $[\text{nBu}_4\text{N}][\text{PF}_6]$  and a glass carbon serving as a supporting electrolyte and working electrode, respectively, at a scan rate of 100 mV. (b) the variable-scan-rate CV (5~ 300 mV) measurements of complex **1** in in  $\text{CH}_3\text{CN}$  with 0.1 M  $[\text{nBu}_4\text{N}][\text{PF}_6]$ . (c) The  $\Delta E_p$  vs. scan rate and  $i_{pa}/i_{pc}$  vs. scan rate plots

**Fig. S4** The schematic representation of d-orbital splitting pattern of complex **1** derived from DFT calculations. Note that the energy of each d orbital pair is shown in eV.

**Fig. S5** The bonding interactions between Cu ion and BIMETA in **1** analyzed by ETS-NOCV methods. The key SFOs and the associated deformation densities for (a) charge transfer from ligand 2p to Cu 4s orbitals; (b) charge transfer from ligand 2p to Cu 4p<sub>x</sub>/4p<sub>y</sub> orbitals. Note that the blue and red color shown in the deformation densities represents the increase and decrease of the electron densities, respectively.

**Fig. S6** CO<sub>(g)</sub> and O<sub>2(g)</sub> binding of complex **1** in CH<sub>3</sub>CN solution characterized by UV-vis absorption spectroscopy

**Fig. S7** The UV-vis absorption spectra of PhIO-titration reactions into the CH<sub>3</sub>CN solution of complex **1** at -40 °C. Each UV-vis absorption spectrum was measured after addition of 0.1/0.2 equiv of PhIO dissolved CH<sub>3</sub>CN solution. The increase of a characteristic absorption band of complex **1**<sup>ox</sup> at 640 nm was monitored upon addition of different equiv PhIO.

**Fig. S8** The IR spectra of <sup>16</sup>O<sub>2</sub>-generated (black) and <sup>18</sup>O<sub>2</sub>-generated (red) complex **1**<sup>ox</sup>

**Fig. S9** The full-range ESI mass spectra of (a) <sup>16</sup>O<sub>2</sub>-generated **1**<sup>ox</sup>; (b) <sup>18</sup>O<sub>2</sub>-generated **1**<sup>ox</sup>, and the isotope distribution pattern of <sup>18</sup>O<sub>2</sub>-generated **1**<sup>ox</sup>.

**Fig. S10** Typical IR signature and structure of dicopper(II)-bis-μ-hydroxo in relevant papers.

**Fig. S11** The isotope distribution pattern of <sup>16</sup>O<sub>2</sub>-generated **1**<sup>ox</sup> measured by ESI-MS and its simulated spectrum including dicopper(II)-bis-μ-hydroxo.

**Fig. S12** The <sup>1</sup>H NMR spectrum resulting from the stoichiometric reaction between TBBP and complex **1**<sup>ox</sup>

**Fig. S13** The <sup>1</sup>H NMR spectrum resulting from the stoichiometric reaction between DTBP and complex **1**<sup>ox</sup>

**Fig. S14** The proposed mechanism for the formation of TBOBF from the reaction of DTBP and complex **1**<sup>ox</sup>

**Fig. S15** The <sup>1</sup>H NMR spectra of catalyticytic oxidation of DTBP with different mol% loading of complex **1**<sup>ox</sup> (2 ~ 10 mol%)

**Fig. S16** The <sup>1</sup>H NMR spectra of time-course analysis (10 min ~ 240 min) of product distributions (10 mol% loading of catalyst **1**<sup>ox</sup>)

**Scheme S1** The energy profile associated with reaction of two equivalents of [Cu<sup>I</sup>(μ-bimeta)<sub>3</sub>Cu<sup>I</sup>]<sup>2+</sup> with O<sub>2</sub> generating the corresponding 2[Cu<sup>II</sup>(μ-oxo)(μ-bimeta)<sub>3</sub>Cu<sup>II</sup>]<sup>2+</sup>

**Table S1** Selected bond distances (Å) and bond angles (°) of **1** and the corresponding DFT structure

**Table S2** Summary of crystallographic data, intensity collection and structure refinement parameters for complexes **1**.

(a)

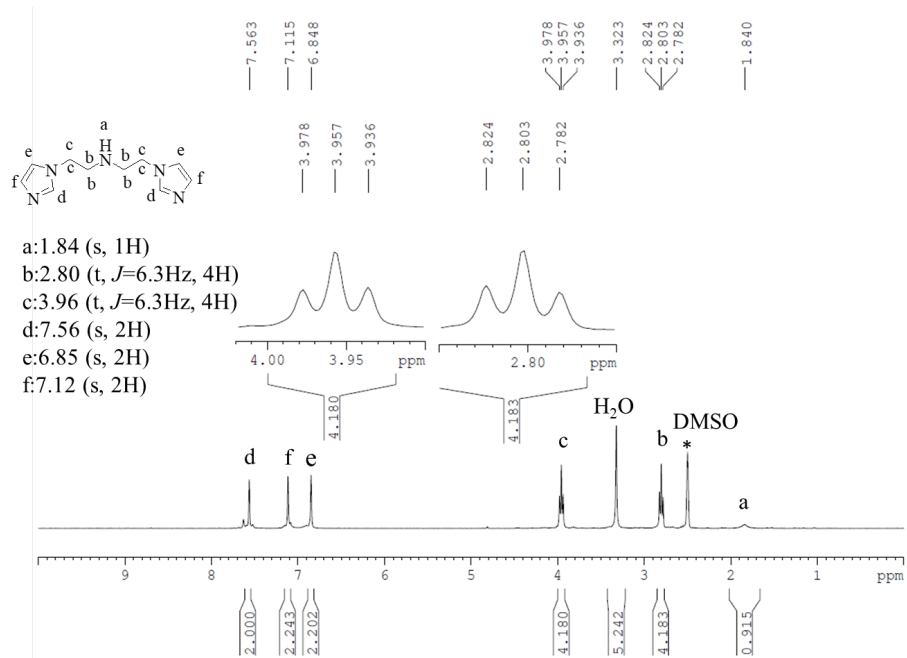

(b)

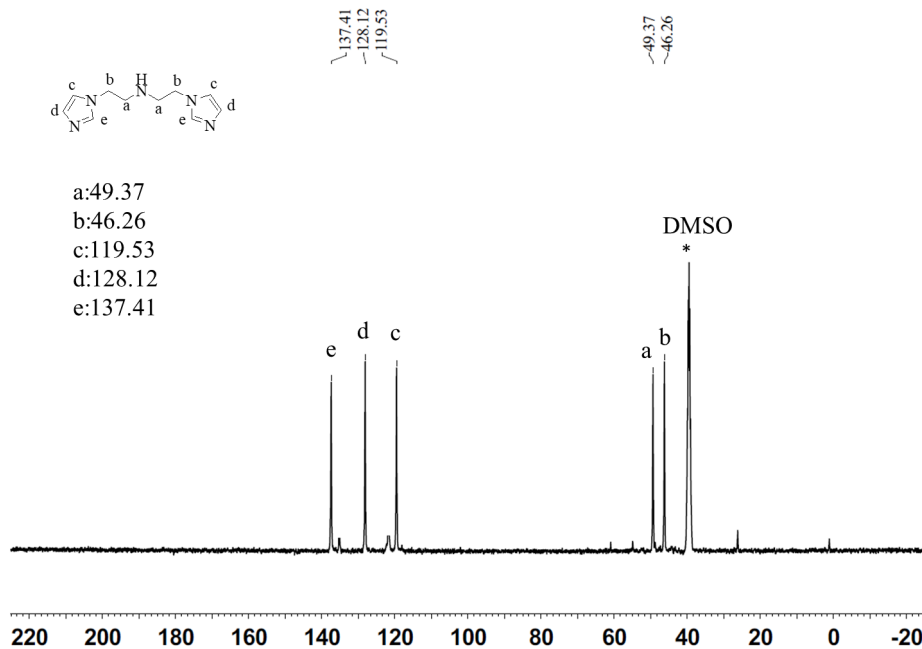

(c)

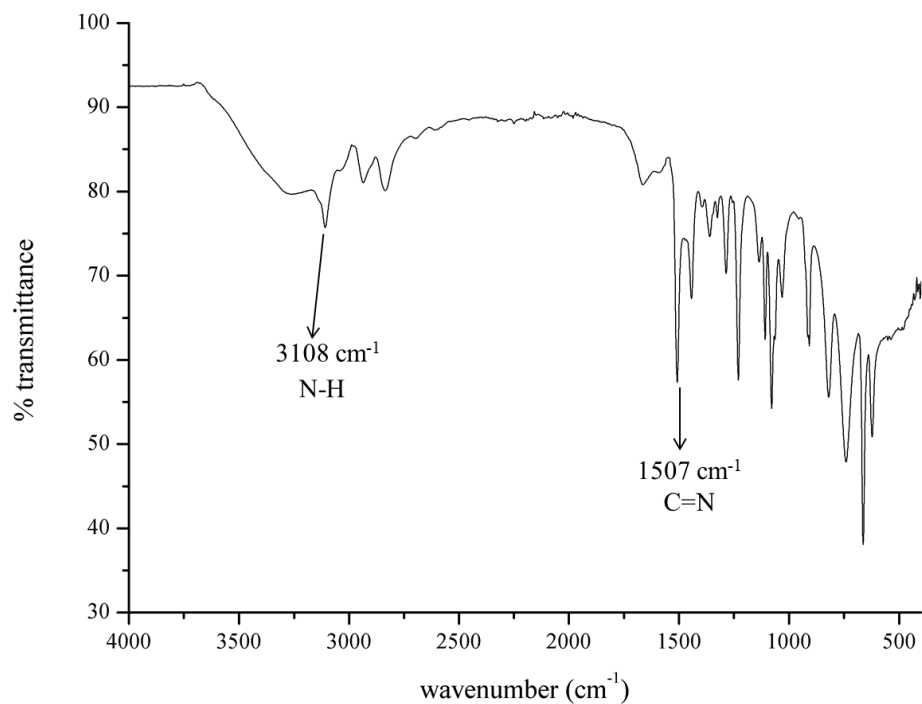

(d)

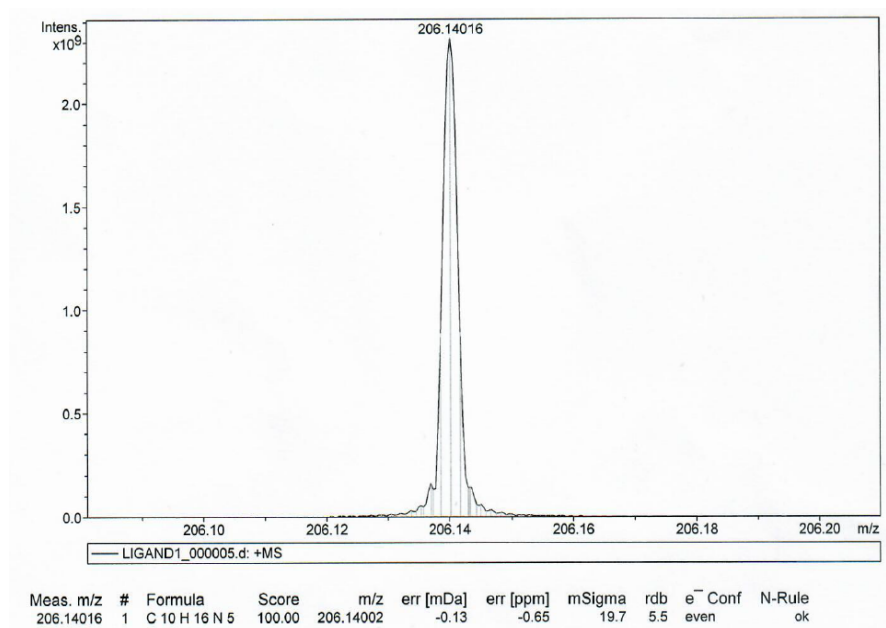

**Fig. S1** The (a)  $^1\text{H}$  NMR and (b)  $^{13}\text{C}$  NMR spectra (c) IR (d) high-resolution FT-Mass of bimeta ligand and the assignments of the corresponding peaks/signals.

(a)

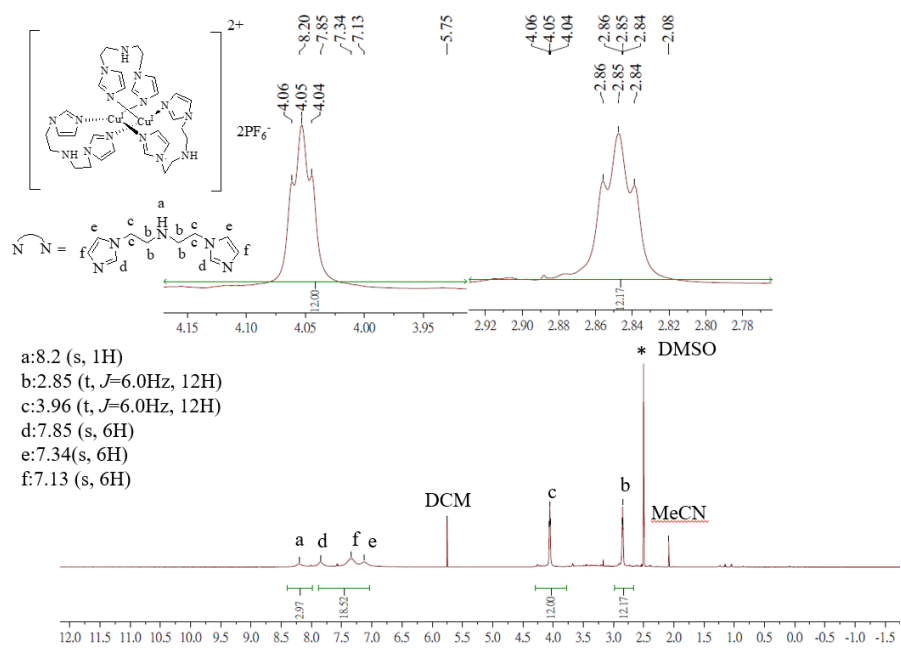

(b)

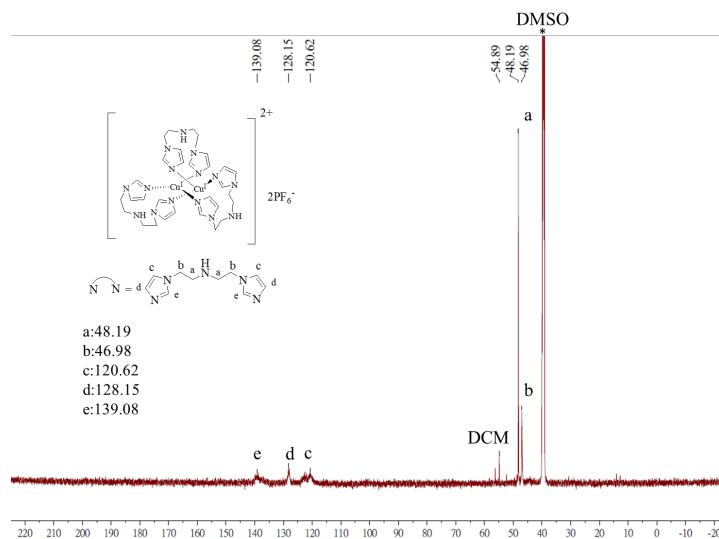

**Fig. S2** The (a)  $^1\text{H}$  NMR and (b)  $^{13}\text{C}$  NMR spectra of complex **1** and the assignments of the corresponding peaks/signals.

(a)

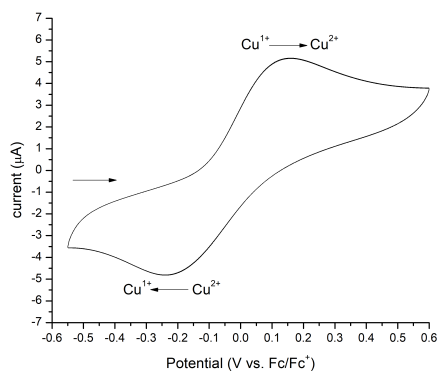

(b)

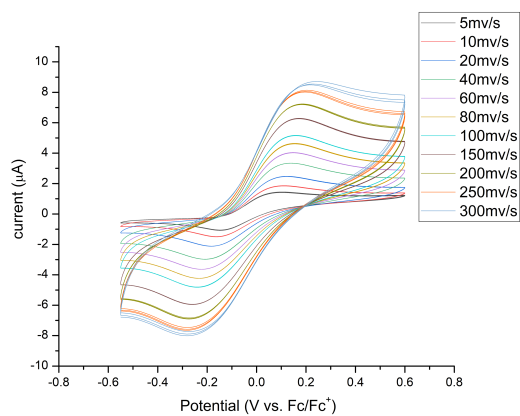

(c)

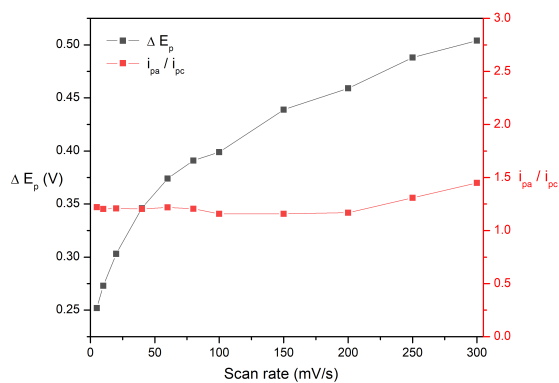

**Fig. S3** (a) The cyclic voltammograms of complex **1** measured in CH<sub>3</sub>CN with 0.1 M [nBu<sub>4</sub>N][PF<sub>6</sub>] and a glass carbon serving as a supporting electrolyte and working electrode, respectively, at a scan rate of 100 mV. (b) the variable-scan-rate CV (5~ 300 mV) measurements of complex **1** in in CH<sub>3</sub>CN with 0.1 M [nBu<sub>4</sub>N][PF<sub>6</sub>]. (c) The  $\Delta E_p$  vs. scan rate and  $i_{pa}/i_{pc}$  vs. scan rate plots

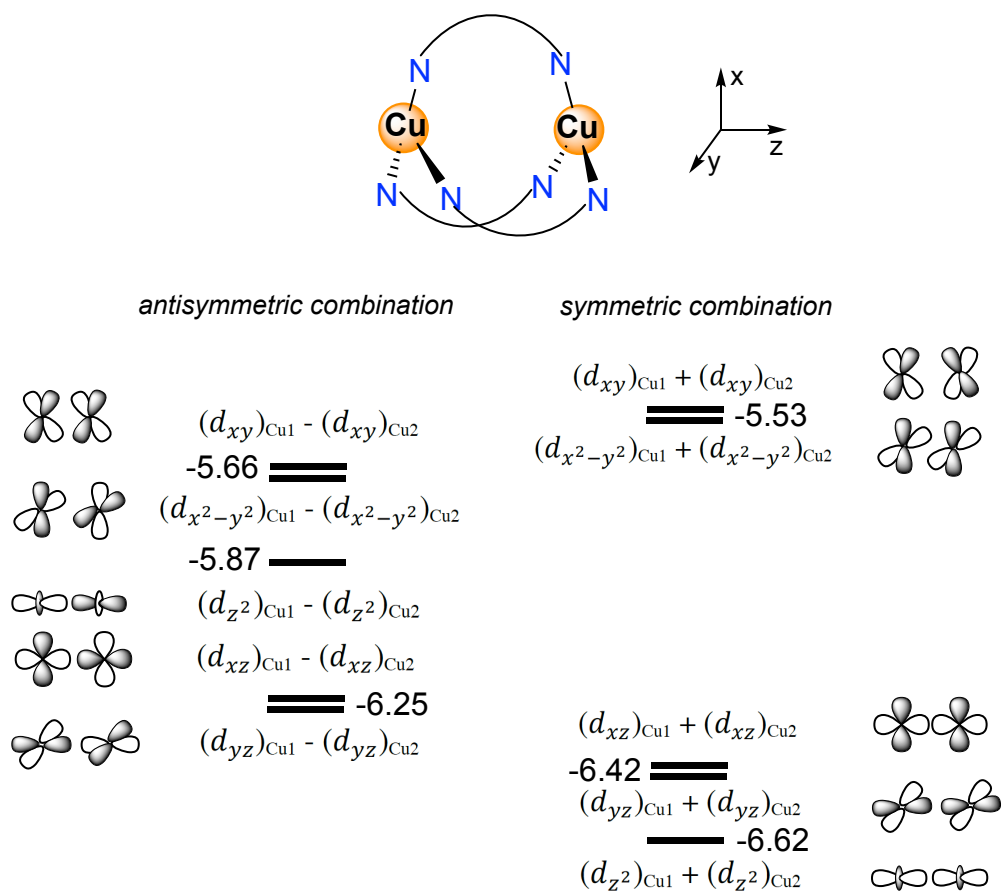

**Fig. S4** The schematic representation of d-orbital splitting pattern of complex **1** derived from DFT calculations. Note that the energy of each d orbital pair is shown in eV.



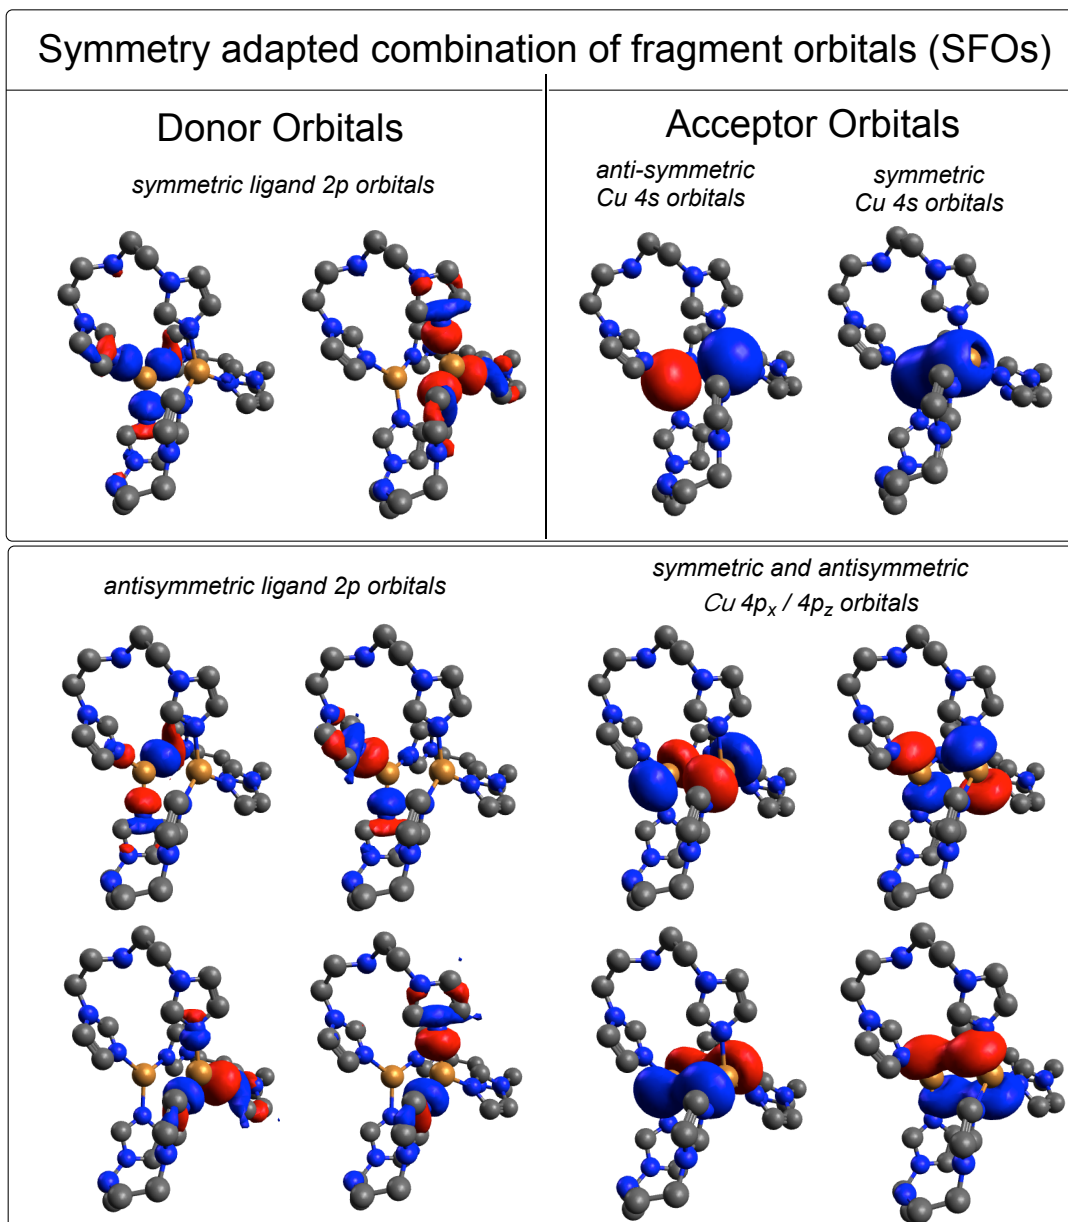

**Fig. S5** The bonding interactions between Cu ion and BIMETA in **1** analyzed by ETS-NOCV methods. The key SFOs and the associated deformation densities for (a) charge transfer from ligand 2p to Cu 4s orbitals; (b) charge transfer from ligand 2p to Cu 4p<sub>x</sub>/4p<sub>y</sub> orbitals. Note that the blue and red color shown in the deformation densities represents the increase and decrease of the electron densities, respectively.

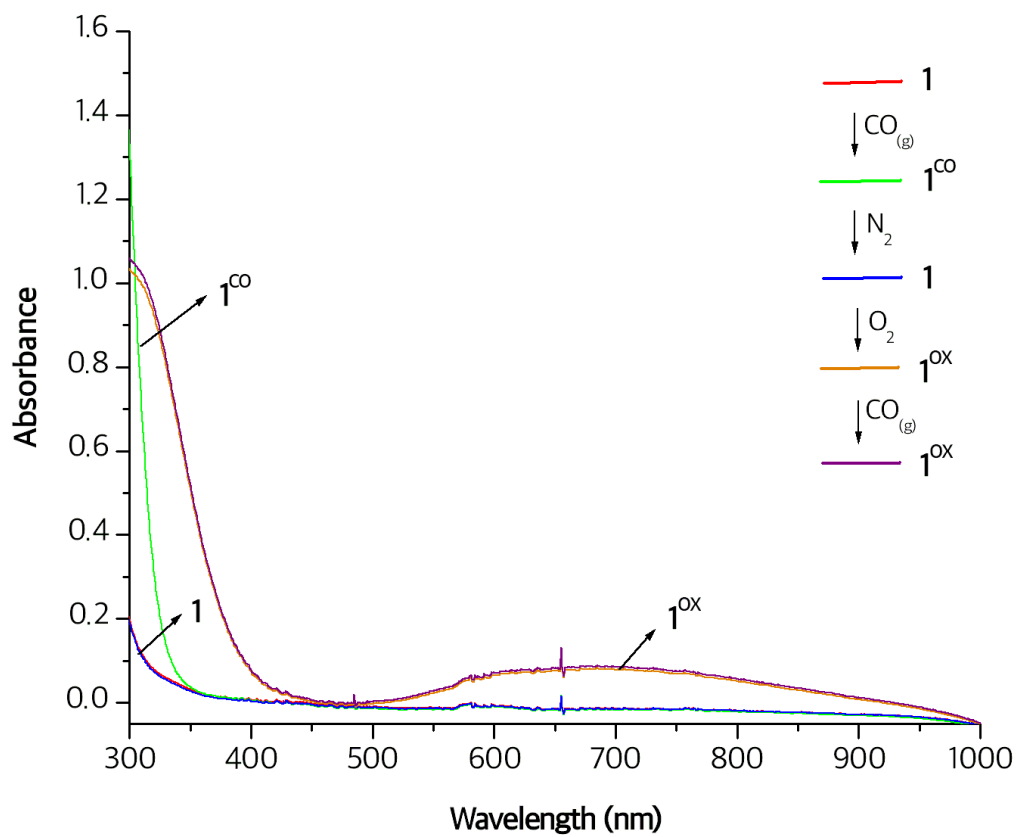

**Fig. S6** CO<sub>(g)</sub> and O<sub>2(g)</sub> binding of complex **1** in CH<sub>3</sub>CN solution characterized by UV-vis absorption spectroscopy

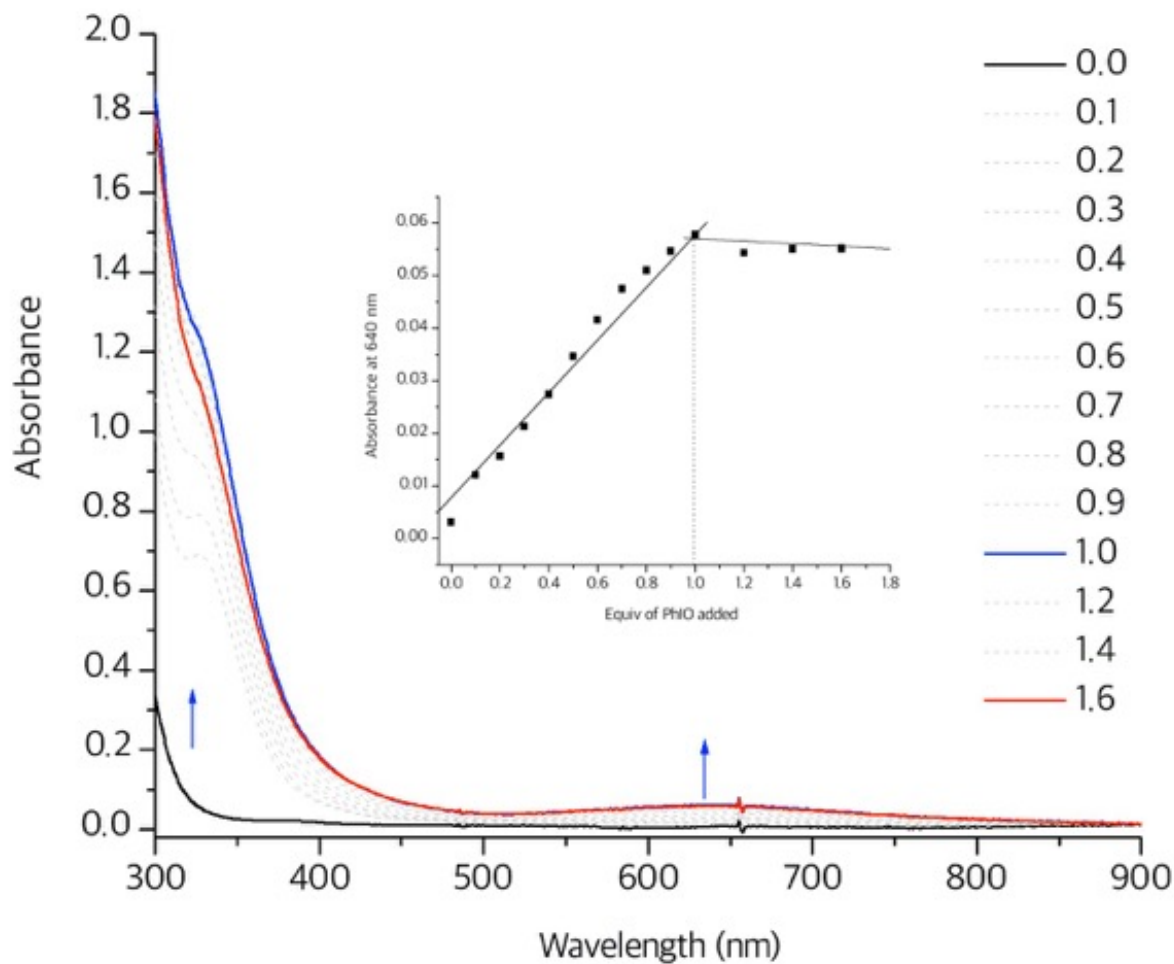

**Fig. S7** The UV-vis absorption spectra of PhIO-titration reactions into the CH<sub>3</sub>CN solution of complex **1** at -40 °C. Each UV-vis absorption spectrum was measured after addition of 0.1/0.2 equiv of PhIO dissolved CH<sub>3</sub>CN solution. The increase of a characteristic absorption band of complex **1**<sup>ox</sup> at 640 nm was monitored upon addition of different equiv PhIO.

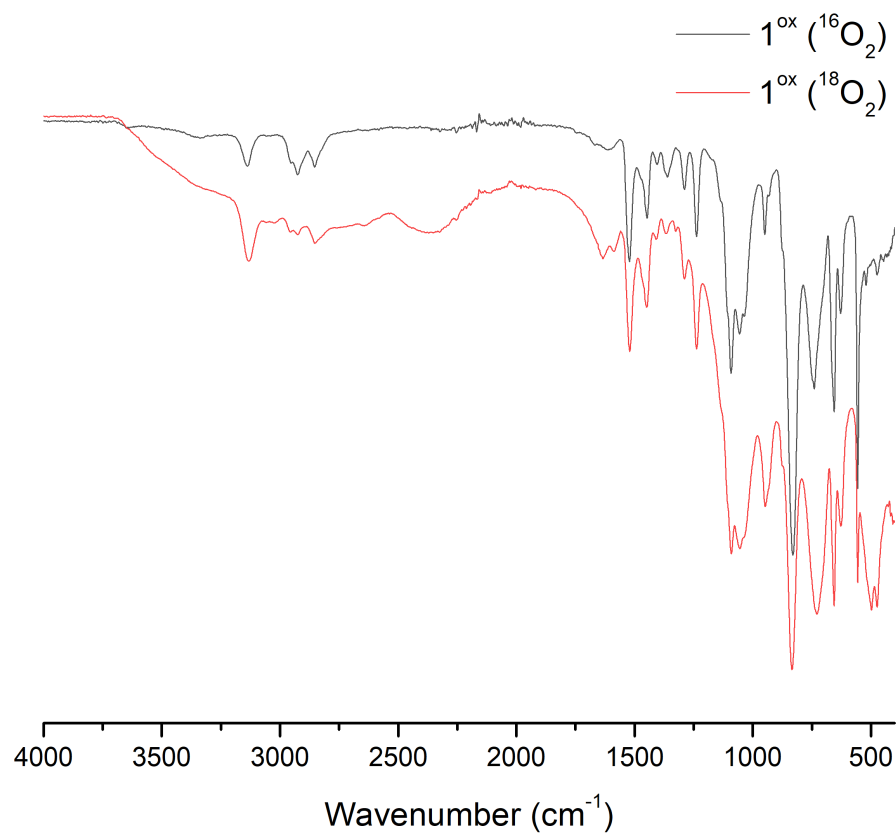

**Fig. S8** The IR spectra of  $^{16}\text{O}_2$ -generated (black) and  $^{18}\text{O}_2$ -generated (red) complex  $1^{\text{ox}}$

(a)

Mass Scale tuning

ESI-MS-POS-20210716-MECN-1-8-50-1500-85-17-2 1 (0.010)

Scan ES+  
7.53e7

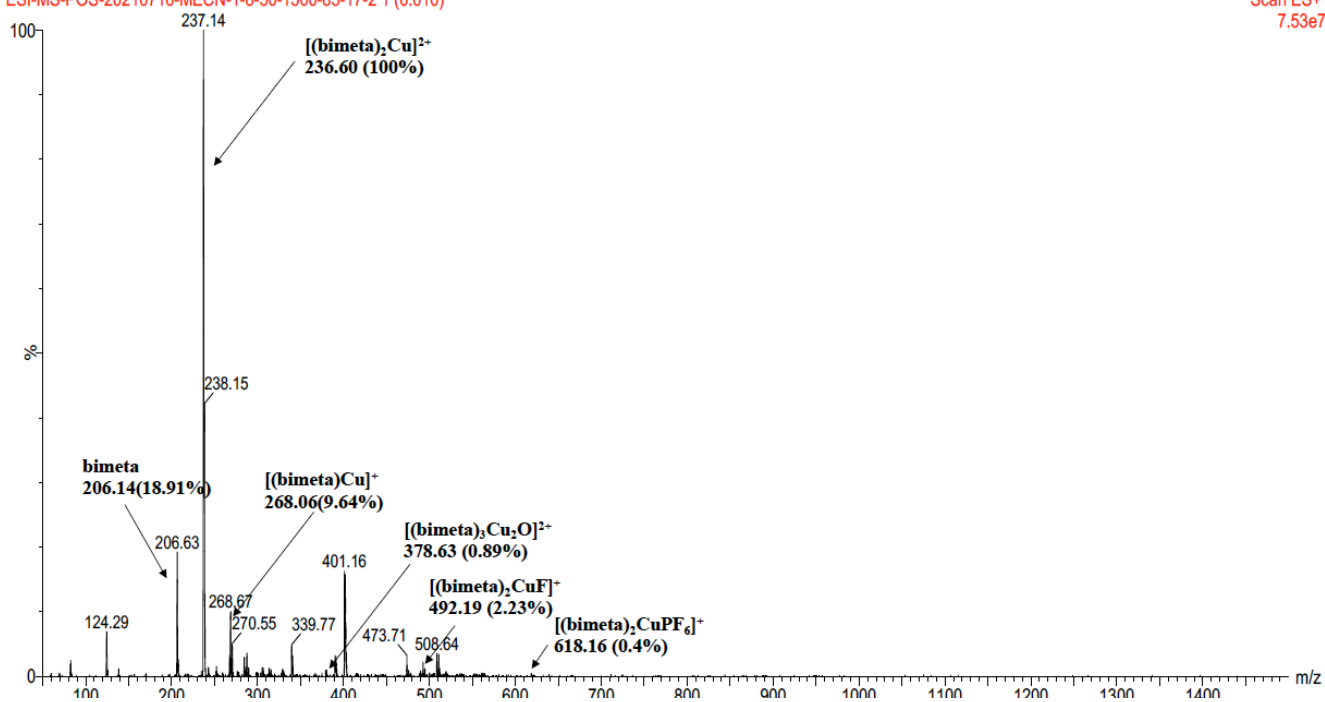

(b)

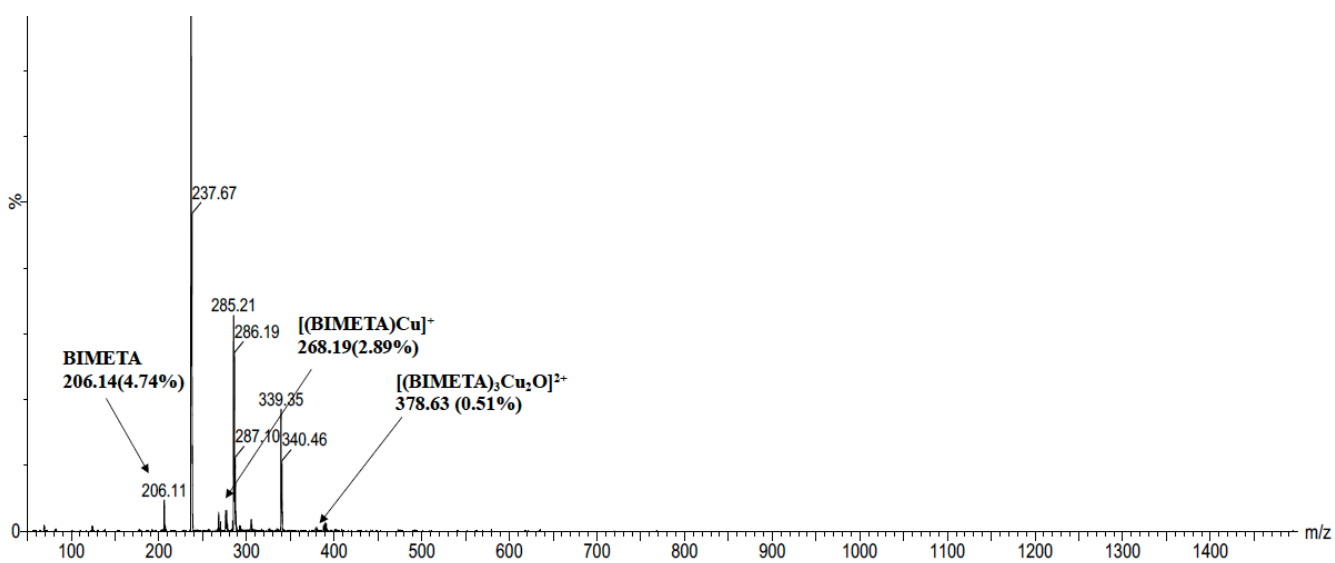

(c)

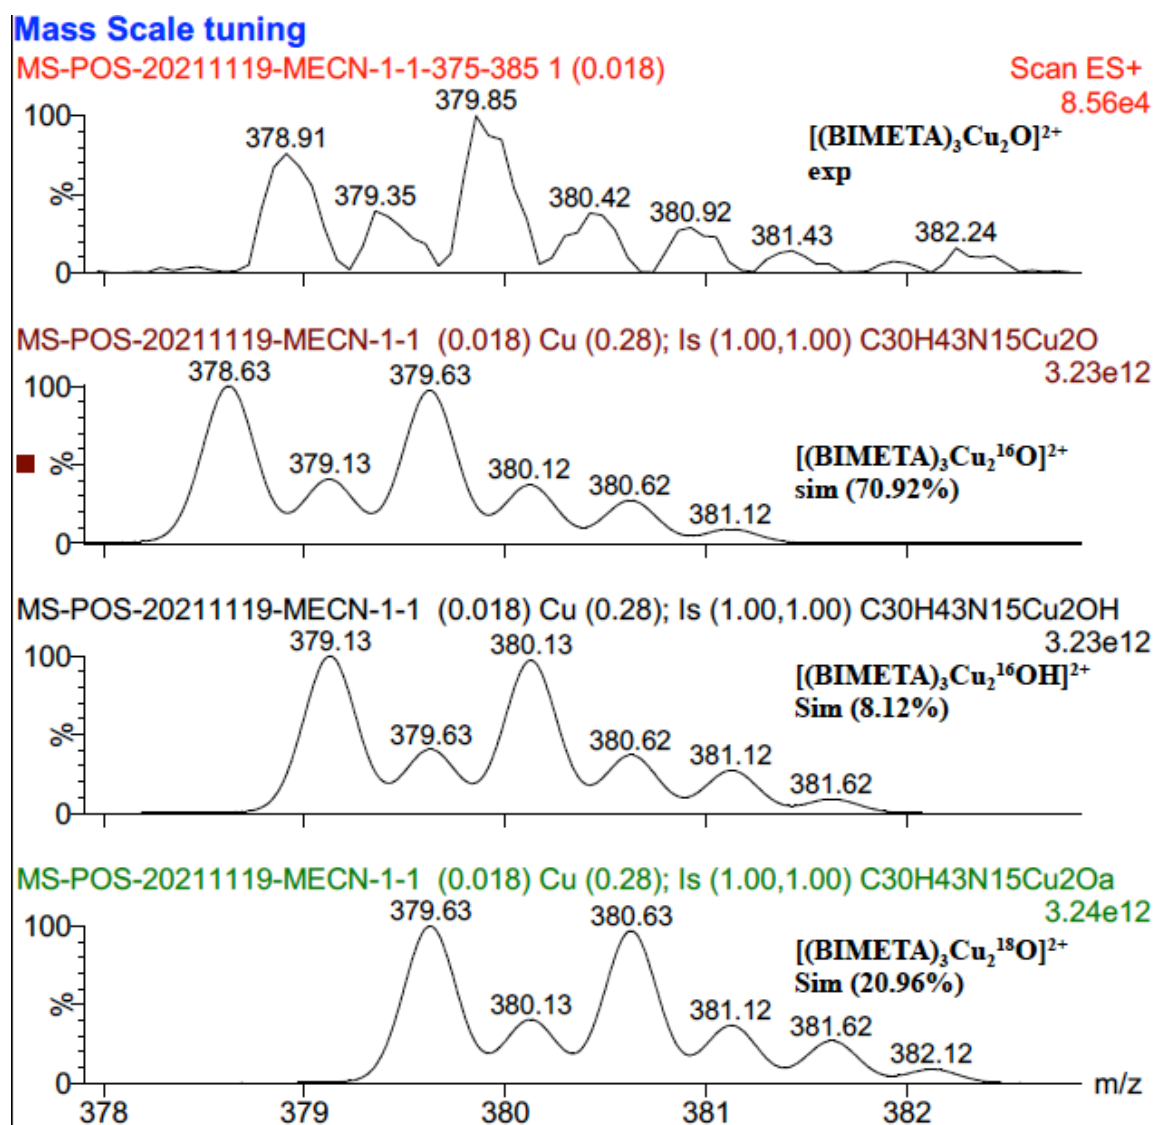

**Fig. S9** The full-range ESI mass spectra of (a)  $^{16}\text{O}_2$ -generated  $\mathbf{1}^{\text{ox}}$ ; (b)  $^{18}\text{O}_2$ -generated  $\mathbf{1}^{\text{ox}}$ , and the isotope distribution pattern of  $^{18}\text{O}_2$ -generated  $\mathbf{1}^{\text{ox}}$ .

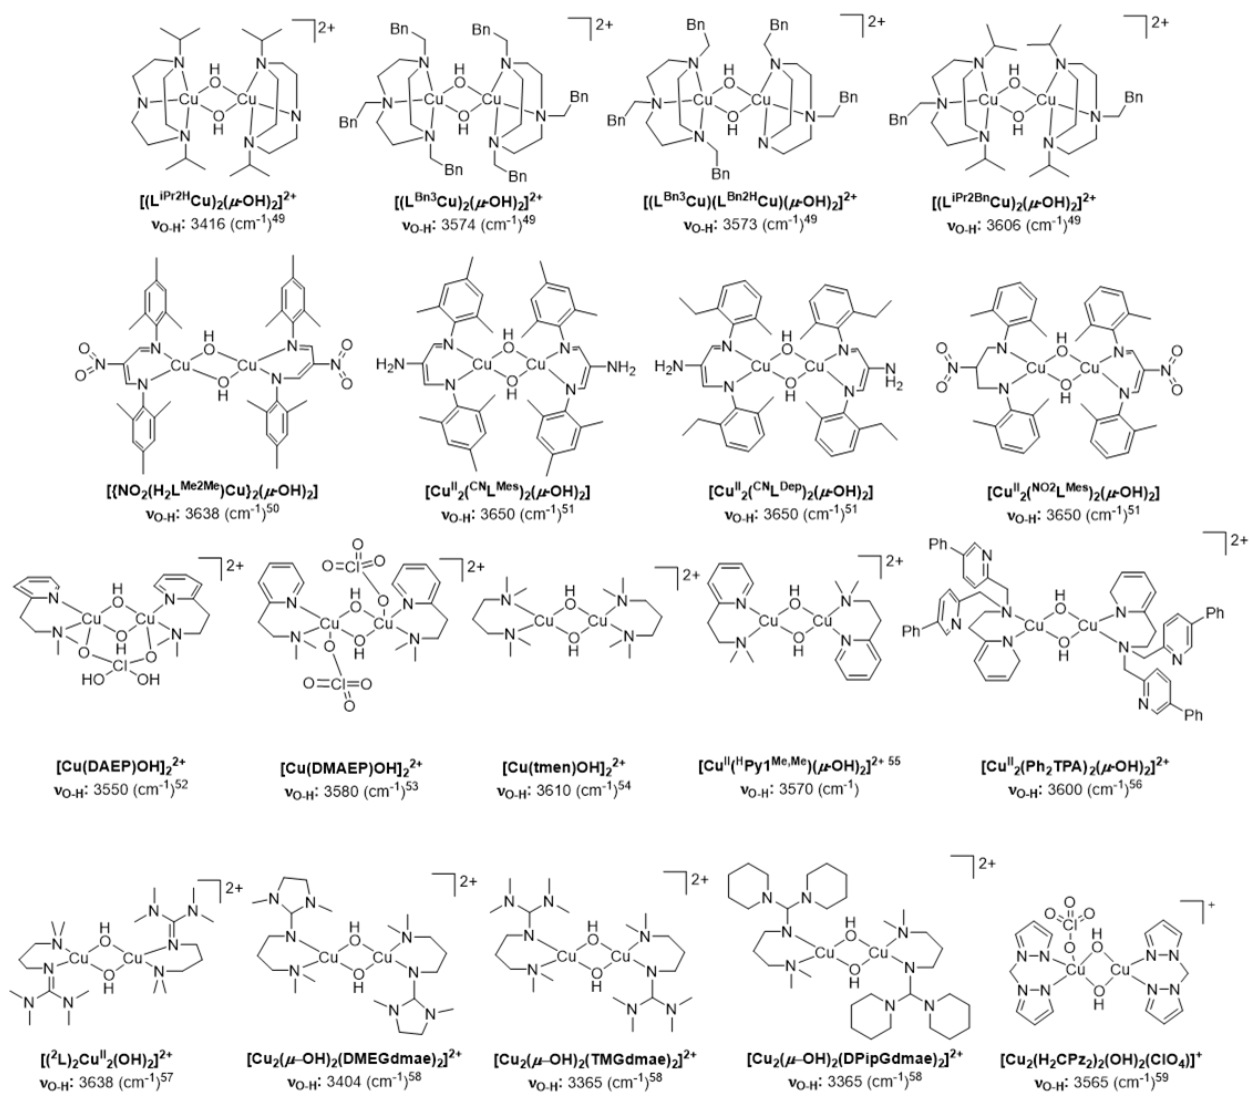

**Fig. S10** Typical IR signature and structure of dicopper(II)-bis- $\mu$ -hydroxo in relevant papers.

### Mass Scale tuning

ESI-MS-POS-20210820-MECN-1-50-1500 100 (1.008) Scan ES+ 2.95e6

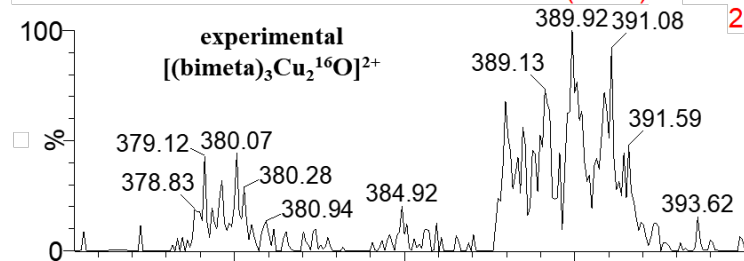

ESI-MS-POS-20210820-MECN-1-375-385 (0.018) Cu (0.28); Is (1.0) 3.23e12

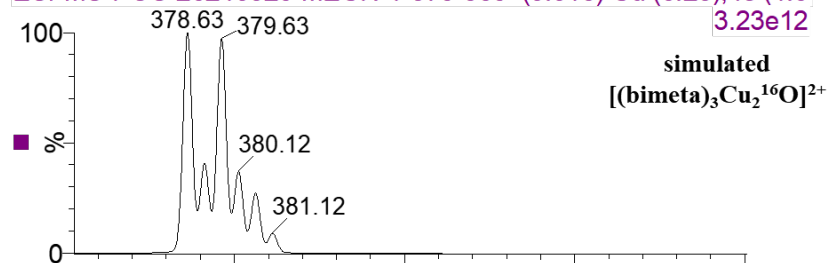

ESI-MS-POS-20210820-MECN-1-375-385 (0.018) Cu (0.28); Is (1.0) 3.22e12

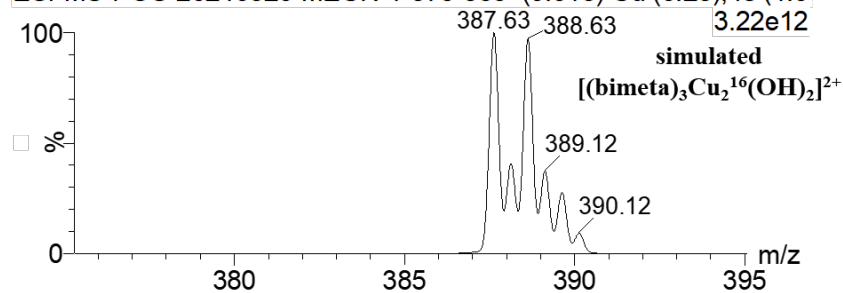

**Fig. S11** The isotope distribution pattern of <sup>16</sup>O<sub>2</sub>-generated **1<sup>ox</sup>** measured by ESI-MS and its simulated spectrum including dicopper(II)-bis-μ-hydroxo.



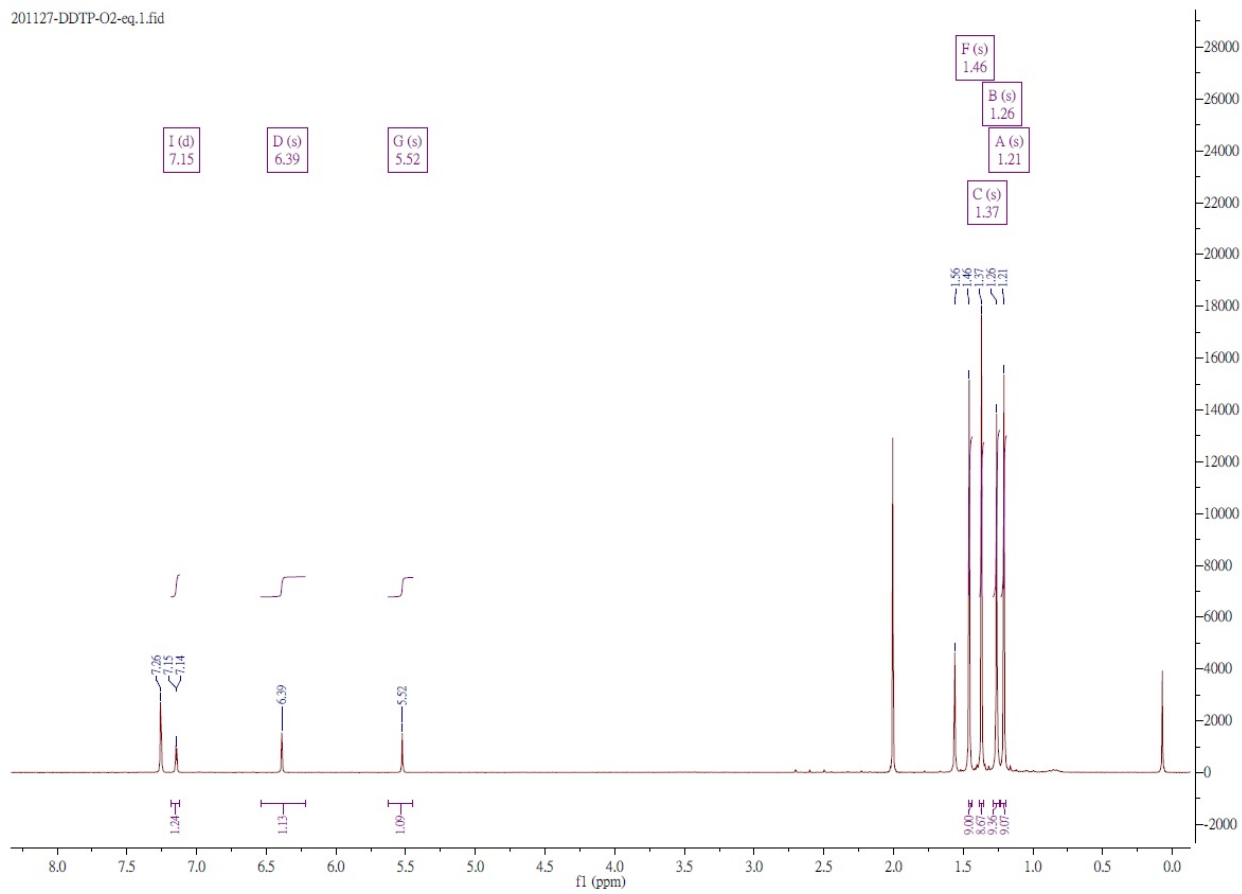

**Fig. S12** The <sup>1</sup>H NMR spectrum resulting from the stoichiometric reaction between TBBP and complex **1<sup>ox</sup>**.

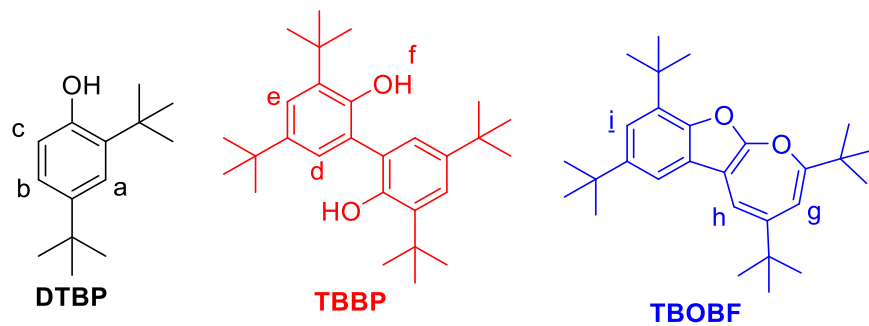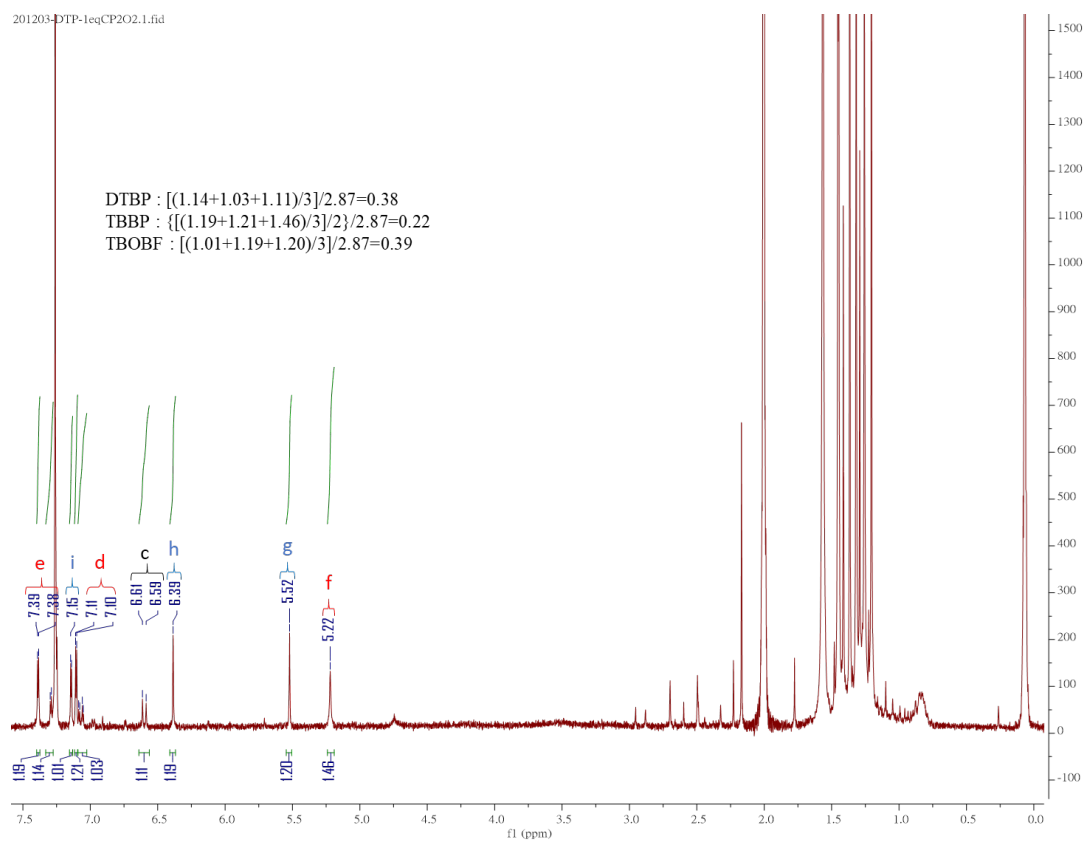

**Fig. S13** The  $^1\text{H}$  NMR spectrum resulting from the stoichiometric reaction between DTBP and complex  $1^{\text{ox}}$

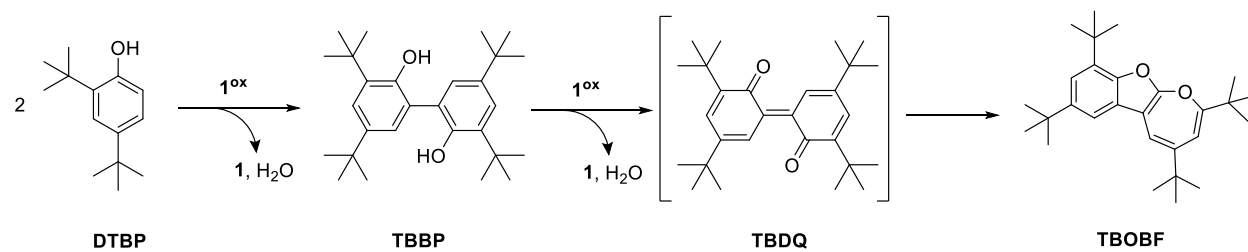

**Fig. S14** The proposed mechanism for the formation of TBOBF from the reaction of DTBP and complex 1<sup>ox</sup>

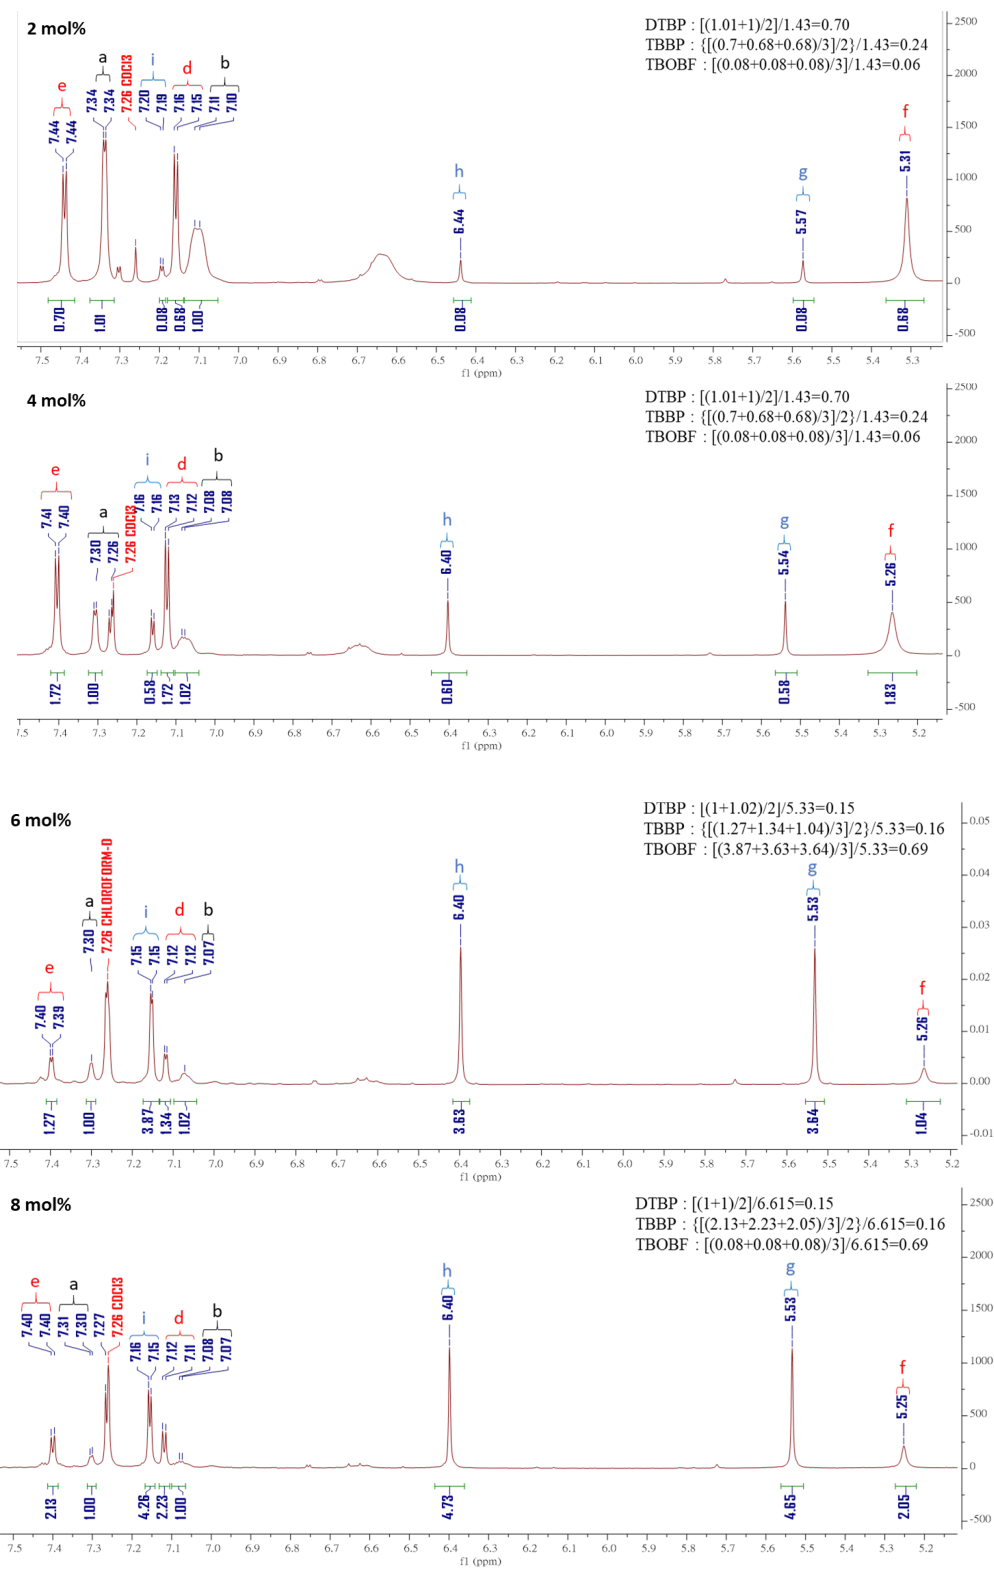

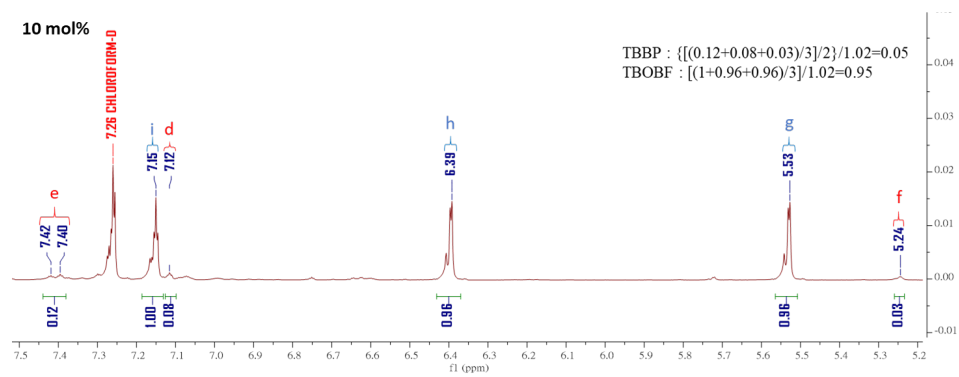

**Fig. S15** The  $^1\text{H}$  NMR spectra of catalyticytic oxidation of DTBP with different mol% loading of complex  $1^{\text{ox}}$  (2 ~ 10 mol%)

10 mol%- 10min

DTBP :  $[(1+1.01)/2]/1.795=0.56$   
TBBP :  $\{[(1.35+1.35)/2]/2\}/1.795=0.37$   
TBOBF :  $[(1+0.96+0.96)/3]/1.795=0.06$

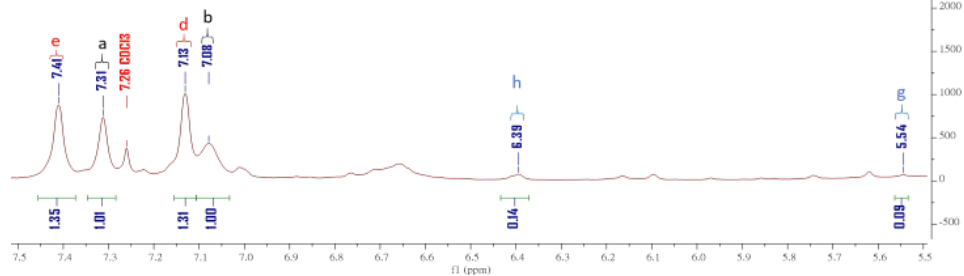

10 mol%- 15min

DTBP :  $[(1+0.98+1.03)/3]/2.82=0.36$   
TBBP :  $\{[(2.23+1.93)/2]/2\}/2.82=0.37$   
TBOBF :  $[(0.79+0.72+0.78)/3]/2.82=0.27$

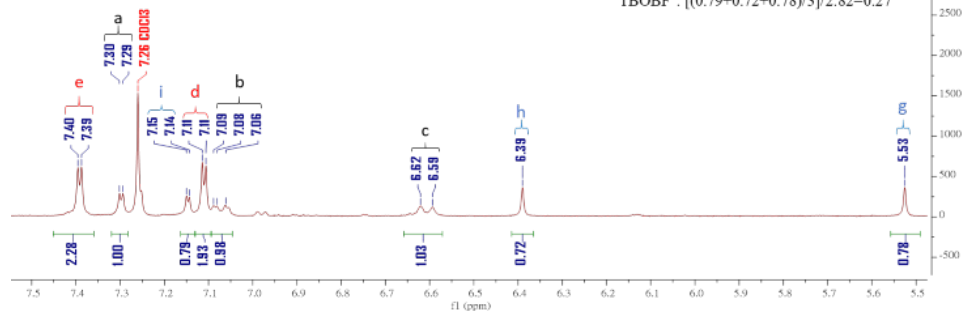

10 mol%- 30min

DTBP :  $[(1+1)/2]/3.66=0.27$   
TBBP :  $\{[(1.35+1.38)/2]/2\}/3.66=0.18$   
TBOBF :  $[(1.95+1.99+1.99)/3]/3.66=0.54$

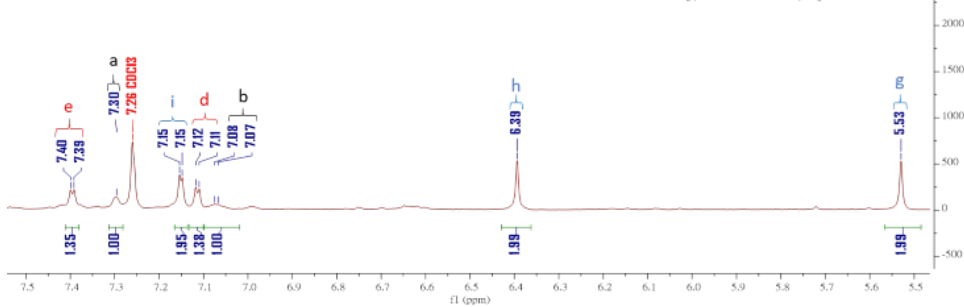

10 mol%- 60min

DTBP :  $[(1+0.98)/2]/5.127=0.19$   
TBBP :  $\{[(1.36+1.72)/2]/2\}/5.127=0.15$   
TBOBF :  $[(3.3+3.41+3.36)/3]/5.127=0.65$

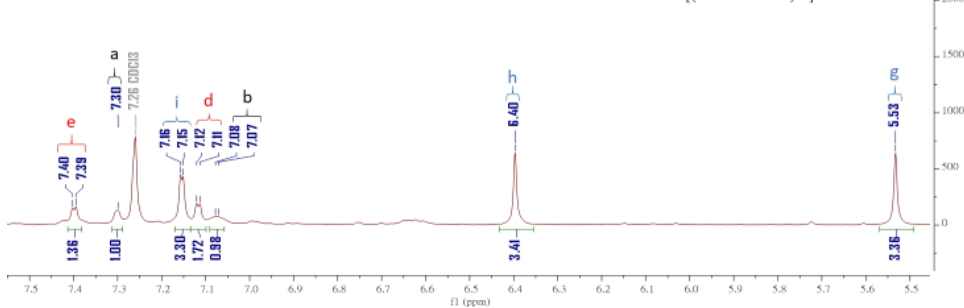

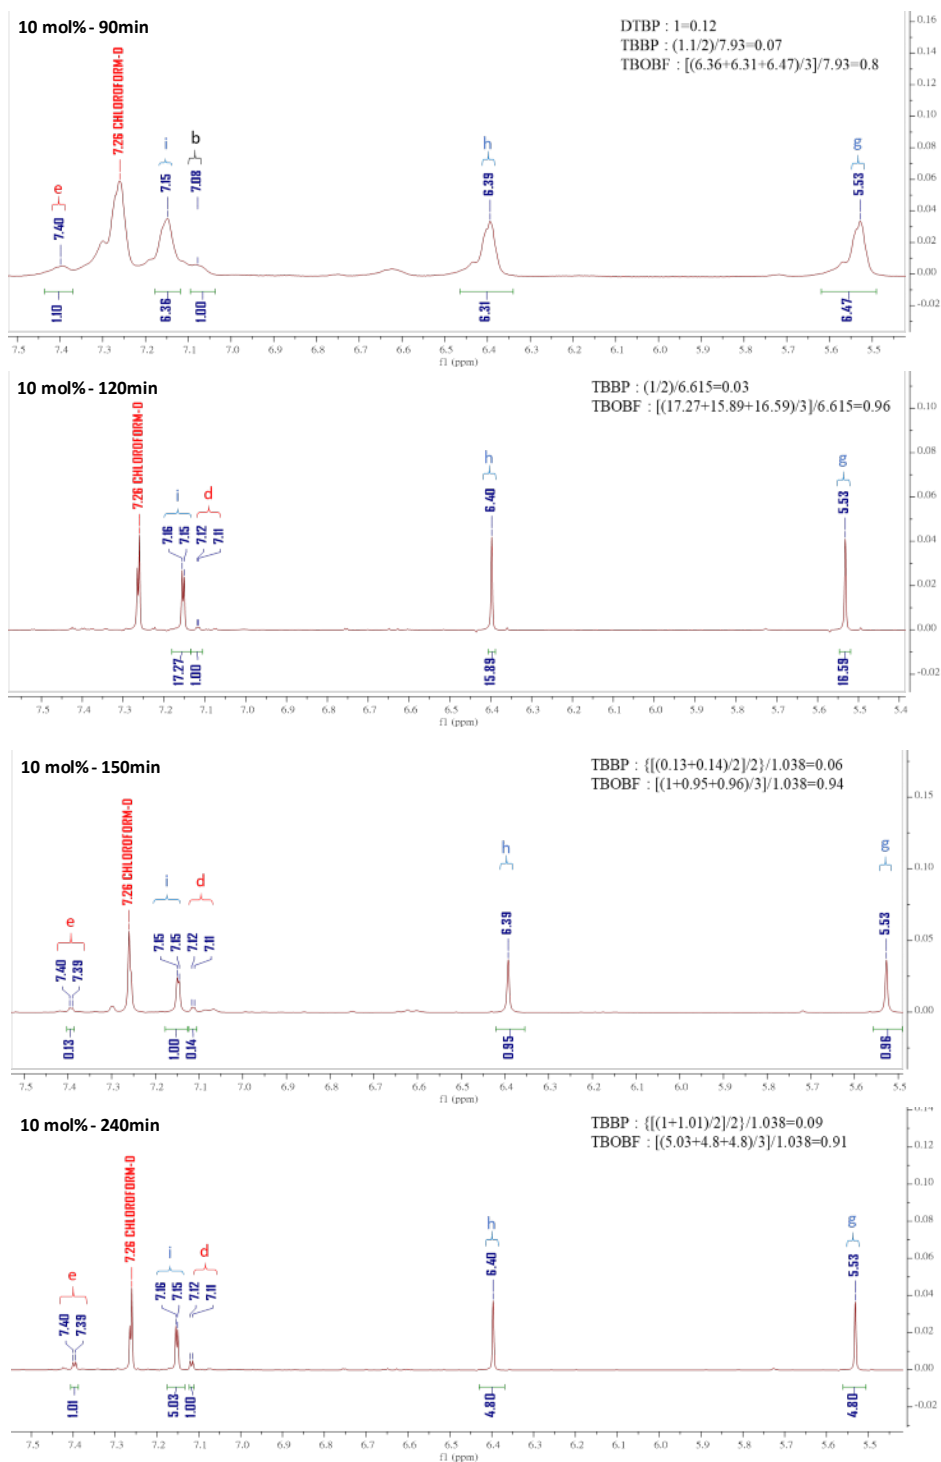

**Fig. S16** The  $^1\text{H}$  NMR spectra of time-course analysis (10 min ~ 240 min) of product distributions (10 mol% loading of catalyst  $1^{\text{ox}}$ )

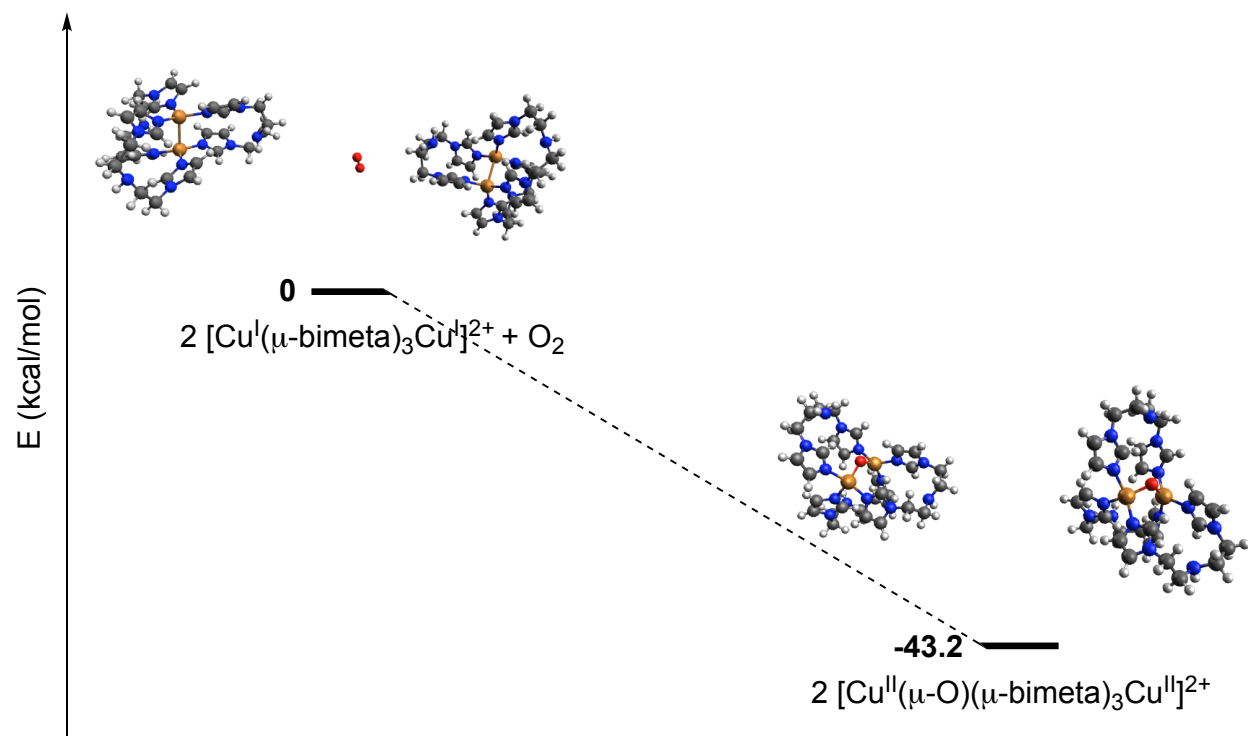

**Scheme S1** The energy profile associated with reaction of two equivalents of  $[\text{Cu}^{\text{I}}(\mu\text{-bimeta})_3\text{Cu}^{\text{I}}]^{2+}$  with  $\text{O}_2$  generating the corresponding  $2[\text{Cu}^{\text{II}}(\mu\text{-oxo})(\mu\text{-bimeta})_3\text{Cu}^{\text{II}}]^{2+}$



**Table S1.** Selected bond distances (Å) and bond angles (°) of **1** and the corresponding DFT structure

|                                          | X-ray structure of<br>complex <b>1</b> | DFT structure of<br>complex <b>1</b> | DFT structure of<br>complex <b>1<sup>ox</sup></b> |
|------------------------------------------|----------------------------------------|--------------------------------------|---------------------------------------------------|
| Cu(1)–N <sub>Im</sub>                    | 1.954(5)                               | 2.023                                | 2.069                                             |
| Cu(2)–N <sub>Im</sub>                    | 1.970(5)                               | 2.033                                | 2.083                                             |
| Cu(1)–Cu(2)                              | 3.0521(18)                             | 3.453                                | 3.051                                             |
| Cu(1)–oxo                                | n.d.                                   | n.d.                                 | 1.835                                             |
| Cu(2)–oxo                                | n.d.                                   | n.d.                                 | 1.850                                             |
| ∠ Cu(1)-oxo–Cu(2)                        | n.d.                                   | n.d.                                 | 111.8                                             |
| ∠ N <sub>Im</sub> -Cu(1)–N <sub>Im</sub> | 119.57(4)                              | 119.9                                | 97.0/102.1/117.9                                  |
| ∠ N <sub>Im</sub> -Cu(2)–N <sub>Im</sub> | 119.926(17)                            | 119.3                                | 97.3/99.2/126.3                                   |
| Cu(1)–N3 plane                           | 0.13                                   | 0.16                                 | 0.804                                             |
| Cu(2)–N3 plane                           | 0.05                                   | 0.07                                 | 0.725                                             |
| total angle around<br>Cu(1) center       | 359                                    | 360                                  | 317                                               |
| total angle around<br>Cu(2) center       | 360                                    | 358                                  | 323                                               |

**Table S2.** Summary of crystallographic data, intensity collection and structure refinement parameters for complexes **1**

|                                             |                                                                                                            |
|---------------------------------------------|------------------------------------------------------------------------------------------------------------|
| Complex number                              | 1                                                                                                          |
| Empirical formula                           | C <sub>6.58</sub> H <sub>10</sub> Cu <sub>0.44</sub> F <sub>2.67</sub> N <sub>3.33</sub> P <sub>0.44</sub> |
| Formula weight                              | 228.51                                                                                                     |
| Temperature/K                               | 113(2)                                                                                                     |
| Crystal system                              | trigonal                                                                                                   |
| Space group                                 | P-3                                                                                                        |
| a/Å                                         | 22.8908(4)                                                                                                 |
| b/Å                                         | 22.8908(4)                                                                                                 |
| c/Å                                         | 13.8848(3)                                                                                                 |
| α/°                                         | 90                                                                                                         |
| β/°                                         | 90                                                                                                         |
| γ/°                                         | 120                                                                                                        |
| Volume/Å <sup>3</sup>                       | 6300.7(3)                                                                                                  |
| Z                                           | 27                                                                                                         |
| ρ <sub>calc</sub> /cm <sup>3</sup>          | 1.626                                                                                                      |
| μ/mm <sup>-1</sup>                          | 1.187                                                                                                      |
| F(000)                                      | 3142.0                                                                                                     |
| Crystal size/mm <sup>3</sup>                | 0.2 × 0.2 × 0.2                                                                                            |
| Radiation                                   | Mo Kα (λ = 0.71073)                                                                                        |
| 2θ range for data collection/°              | 3.582 to 54.088                                                                                            |
| Index ranges                                | -29 ≤ h ≤ 28, -18 ≤ k ≤ 27, -17 ≤ l ≤ 16                                                                   |
| Reflections collected                       | 41314                                                                                                      |
| Independent reflections                     | 8745 [R <sub>int</sub> = 0.0313, R <sub>sigma</sub> = 0.0411]                                              |
| Data/restraints/parameters                  | 8745/939/646                                                                                               |
| Goodness-of-fit on F <sup>2</sup>           | 1.026                                                                                                      |
| Final R indexes [I ≥ 2σ (I)] <sup>a,b</sup> | R <sub>1</sub> = 0.0874, wR <sub>2</sub> = 0.2170                                                          |
| Final R indexes [all data]                  | R <sub>1</sub> = 0.1380, wR <sub>2</sub> = 0.2470                                                          |
| Largest diff. peak/hole / e Å <sup>-3</sup> | 0.88/-0.86                                                                                                 |

<sup>a</sup> R<sub>1</sub> = (Σ||F<sub>o</sub>| - |F<sub>c</sub>||) / (Σ|F<sub>o</sub>|). <sup>b</sup> wR<sub>2</sub> = [Σw(F<sub>o</sub><sup>2</sup> - F<sub>c</sub><sup>2</sup>)<sup>2</sup> / Σw(F<sub>o</sub><sup>2</sup>)<sup>2</sup>]<sup>1/2</sup>

The coordinates of DFT optimized structure (complex 1)

|    |          |          |          |
|----|----------|----------|----------|
| Cu | -0.00298 | -0.00035 | -1.69688 |
| Cu | -0.00582 | 0.00108  | 1.75626  |
| N  | 0.92980  | -1.79591 | -1.75847 |
| N  | 1.27662  | -3.95192 | -2.12096 |
| N  | -0.64437 | -5.68067 | -0.61221 |
| N  | -0.65249 | -4.12932 | 2.03941  |
| N  | -0.65868 | -1.91841 | 1.91708  |
| N  | -2.02286 | 0.09804  | -1.76350 |
| N  | -4.05874 | 0.88621  | -2.12954 |
| N  | -4.59288 | 3.40918  | -0.61039 |
| N  | -3.25869 | 2.62599  | 2.04453  |
| N  | -1.34152 | 1.52457  | 1.92465  |
| N  | 1.09241  | 1.70147  | -1.76895 |
| N  | 2.79293  | 3.06908  | -2.14030 |
| N  | 5.24526  | 2.26537  | -0.62477 |
| N  | 3.89788  | 1.49946  | 2.02905  |
| N  | 1.98329  | 0.39301  | 1.91383  |
| C  | 0.40775  | -2.92061 | -2.22462 |
| C  | 2.20052  | -2.12222 | -1.32390 |
| C  | 2.42757  | -3.45599 | -1.53869 |
| C  | 0.99548  | -5.35376 | -2.43912 |
| C  | 0.59484  | -6.17603 | -1.20708 |
| C  | -0.96769 | -6.23744 | 0.70302  |
| C  | -0.23683 | -5.52049 | 1.84886  |
| C  | -1.77780 | -3.69613 | 2.71463  |
| C  | -1.76754 | -2.33056 | 2.63213  |
| C  | -0.01628 | -3.02739 | 1.57654  |
| C  | -2.72984 | 1.11723  | -2.22862 |
| C  | -2.94642 | -0.83644 | -1.33468 |
| C  | -4.21218 | -0.35967 | -1.55172 |
| C  | -5.12700 | 1.83643  | -2.44787 |
| C  | -5.64151 | 2.59024  | -1.21432 |
| C  | -4.91822 | 3.96189  | 0.70612  |
| C  | -4.66986 | 2.96454  | 1.84840  |
| C  | -2.32394 | 3.37747  | 2.73110  |
| C  | -1.14680 | 2.68508  | 2.64998  |
| C  | -2.62118 | 1.52694  | 1.57667  |
| C  | 2.32859  | 1.80226  | -2.23418 |
| C  | 0.74479  | 2.97026  | -1.34543 |
| C  | 1.79059  | 3.82723  | -1.56569 |
| C  | 4.15020  | 3.51737  | -2.45992 |
| C  | 5.06175  | 3.58380  | -1.22735 |
| C  | 5.88559  | 2.26884  | 0.69223  |
| C  | 4.89707  | 2.55216  | 1.83402  |
| C  | 4.08385  | 0.30981  | 2.70727  |
| C  | 2.89429  | -0.36139 | 2.62917  |
| C  | 2.62446  | 1.50139  | 1.56894  |
| H  | -1.42165 | -5.84857 | -1.24901 |
| H  | -0.58188 | -3.02790 | -2.64400 |
| H  | 2.85614  | -1.38047 | -0.89196 |
| H  | 3.29122  | -4.07979 | -1.36207 |
| H  | 0.19778  | -5.36545 | -3.18834 |

|   |          |          |          |
|---|----------|----------|----------|
| H | 1.88532  | -5.78615 | -2.90558 |
| H | 1.39436  | -6.10599 | -0.46075 |
| H | 0.53839  | -7.23569 | -1.50933 |
| H | -2.04709 | -6.13900 | 0.85599  |
| H | -0.72973 | -7.31184 | 0.78077  |
| H | 0.84407  | -5.51647 | 1.68344  |
| H | -0.41524 | -6.05618 | 2.78611  |
| H | -2.45261 | -4.38505 | 3.20024  |
| H | -2.46399 | -1.62037 | 3.05259  |
| H | 0.89659  | -3.07299 | 1.00002  |
| H | -4.34444 | 4.16880  | -1.24216 |
| H | -2.32247 | 2.02726  | -2.64415 |
| H | -2.63767 | -1.77818 | -0.90525 |
| H | -5.18671 | -0.79193 | -1.37953 |
| H | -4.73202 | 2.53525  | -3.19181 |
| H | -5.94642 | 1.28763  | -2.92085 |
| H | -5.98640 | 1.86022  | -0.47323 |
| H | -6.52764 | 3.17353  | -1.51757 |
| H | -4.29242 | 4.84559  | 0.86625  |
| H | -5.96739 | 4.29458  | 0.78060  |
| H | -5.20729 | 2.02800  | 1.67576  |
| H | -5.04865 | 3.38288  | 2.78579  |
| H | -2.58485 | 4.30284  | 3.22244  |
| H | -0.18564 | 2.92882  | 3.07771  |
| H | -3.11480 | 0.76462  | 0.99099  |
| H | 5.77896  | 1.67076  | -1.25681 |
| H | 2.91323  | 0.99273  | -2.64600 |
| H | -0.22547 | 3.17558  | -0.91756 |
| H | 1.90353  | 4.88801  | -1.39772 |
| H | 4.55613  | 2.82589  | -3.20482 |
| H | 4.08540  | 4.50183  | -2.93213 |
| H | 4.60386  | 4.24763  | -0.48523 |
| H | 6.01039  | 4.05828  | -1.53124 |
| H | 6.33712  | 1.28451  | 0.85163  |
| H | 6.69890  | 3.01029  | 0.76818  |
| H | 4.35495  | 3.48595  | 1.66125  |
| H | 5.44826  | 2.67066  | 2.77179  |
| H | 5.01824  | 0.06894  | 3.19174  |
| H | 2.62598  | -1.31772 | 3.05301  |
| H | 2.20818  | 2.31424  | 0.99120  |

The coordinates of DFT optimized structure (complex 1<sup>ox</sup>)

|    |          |          |          |
|----|----------|----------|----------|
| Cu | 0.14112  | 0.80015  | 1.20104  |
| Cu | -0.04766 | -0.61338 | -1.74015 |
| N  | -0.27146 | -0.68309 | 2.61003  |
| N  | -0.36695 | -2.61194 | 3.68894  |
| N  | 0.29595  | -5.14145 | 1.92928  |
| N  | -0.54912 | -4.68617 | -0.96443 |
| N  | -0.09867 | -2.68401 | -1.78253 |
| N  | 1.91433  | 1.57245  | 1.81461  |
| N  | 3.73718  | 2.81163  | 1.69881  |
| N  | 4.88998  | 2.82400  | -1.14419 |
| N  | 4.03750  | 0.11129  | -2.43209 |
| N  | 1.88049  | -0.35154 | -2.38381 |
| N  | -1.41368 | 2.26099  | 1.84966  |
| N  | -3.31441 | 3.38586  | 1.68314  |
| N  | -5.19080 | 2.22692  | -0.57498 |
| N  | -3.67712 | 0.99537  | -2.98257 |
| N  | -1.92810 | -0.25275 | -2.49157 |
| C  | 0.18060  | -1.92957 | 2.65193  |
| C  | -1.14837 | -0.55390 | 3.66785  |
| C  | -1.21558 | -1.73891 | 4.34580  |
| C  | -0.09169 | -3.99555 | 4.09694  |
| C  | -0.56842 | -5.06578 | 3.10989  |
| C  | -0.07298 | -6.19073 | 0.97413  |
| C  | -1.08861 | -5.72055 | -0.07867 |
| C  | 0.40984  | -4.86004 | -1.94492 |
| C  | 0.68059  | -3.61373 | -2.43991 |
| C  | -0.82118 | -3.36535 | -0.90302 |
| C  | 2.57388  | 2.47297  | 1.09780  |
| C  | 2.68627  | 1.32002  | 2.93019  |
| C  | 3.82159  | 2.08086  | 2.87073  |
| C  | 4.75758  | 3.71921  | 1.16515  |
| C  | 5.63871  | 3.07405  | 0.08857  |
| C  | 5.61823  | 2.04120  | -2.14733 |
| C  | 5.37560  | 0.53031  | -2.00128 |
| C  | 3.67274  | -0.22890 | -3.72122 |
| C  | 2.33581  | -0.51389 | -3.67758 |
| C  | 2.92556  | 0.03054  | -1.66560 |
| C  | -2.61099 | 2.29182  | 1.28758  |
| C  | -1.33959 | 3.37926  | 2.65203  |
| C  | -2.50864 | 4.08576  | 2.56369  |
| C  | -4.70071 | 3.73547  | 1.34714  |
| C  | -5.05794 | 3.62098  | -0.13720 |
| C  | -5.69409 | 2.06895  | -1.94239 |
| C  | -4.58961 | 2.14113  | -3.00820 |
| C  | -3.89462 | -0.24402 | -3.55985 |
| C  | -2.80160 | -1.00585 | -3.24949 |
| C  | -2.48603 | 0.94207  | -2.34995 |
| H  | 1.25646  | -5.29813 | 2.23217  |
| H  | 0.87547  | -2.38014 | 1.95912  |
| H  | -1.65713 | 0.37759  | 3.86204  |
| H  | -1.76852 | -2.03775 | 5.22353  |
| H  | 0.98423  | -4.09960 | 4.28058  |
| H  | -0.59369 | -4.14134 | 5.05589  |

|   |          |          |          |
|---|----------|----------|----------|
| H | -1.59234 | -4.83484 | 2.79322  |
| H | -0.60995 | -6.02456 | 3.65561  |
| H | 0.83600  | -6.52051 | 0.46102  |
| H | -0.49737 | -7.07870 | 1.47162  |
| H | -1.98514 | -5.30860 | 0.39256  |
| H | -1.40278 | -6.57066 | -0.69217 |
| H | 0.79026  | -5.83589 | -2.20674 |
| H | 1.37216  | -3.32576 | -3.21717 |
| H | -1.53905 | -2.94117 | -0.21573 |
| H | 4.59861  | 3.71124  | -1.55152 |
| H | 2.24837  | 2.88285  | 0.15403  |
| H | 2.36585  | 0.62805  | 3.69430  |
| H | 4.65814  | 2.18272  | 3.54558  |
| H | 4.25246  | 4.60659  | 0.76948  |
| H | 5.37519  | 4.04631  | 2.00515  |
| H | 6.02065  | 2.11890  | 0.46780  |
| H | 6.51377  | 3.72676  | -0.07109 |
| H | 5.29009  | 2.35620  | -3.14284 |
| H | 6.70569  | 2.21418  | -2.10041 |
| H | 5.50523  | 0.21424  | -0.96242 |
| H | 6.10038  | -0.02402 | -2.60431 |
| H | 4.38598  | -0.24349 | -4.53159 |
| H | 1.67846  | -0.81297 | -4.48093 |
| H | 2.91191  | 0.25972  | -0.61123 |
| H | -5.81584 | 1.73625  | 0.06356  |
| H | -3.00689 | 1.57315  | 0.58622  |
| H | -0.45607 | 3.60370  | 3.23216  |
| H | -2.83884 | 5.00139  | 3.03098  |
| H | -5.38203 | 3.11872  | 1.94774  |
| H | -4.84446 | 4.77153  | 1.66261  |
| H | -4.28231 | 4.11535  | -0.73403 |
| H | -5.99225 | 4.18888  | -0.29130 |
| H | -6.18775 | 1.09441  | -2.01402 |
| H | -6.44910 | 2.83235  | -2.19745 |
| H | -3.98451 | 3.04380  | -2.88802 |
| H | -5.04340 | 2.18513  | -4.00265 |
| H | -4.77965 | -0.45644 | -4.14066 |
| H | -2.57972 | -2.02532 | -3.52749 |
| H | -2.04163 | 1.75755  | -1.79965 |
| O | -0.20492 | 0.83826  | -0.58678 |
